# Supplementary material for: NPAS4 recruits CCK basket cell synapses and enhances cannabinoid-sensitive inhibition in the mouse hippocampus
Source: eLife. 2018 Jul 27;7:e35927. doi: 10.7554/eLife.35927 (PMC6105310; doi:10.7554/eLife.35927)
Supplement: Figure 1—figure supplement 1—source data 1. [file elife-35927-fig1-figsupp1-data1.xlsx]

## Sheet: Fig 1 Supp. 1
Fig 1 Supp 1: Npas4 + neurons (%)
SE		EE
Sup.	Deep	Sup.	Deep
0.097561	0.0365854	0.141177	0.0588235
0	0.015625	0.0963855	0.108434
0	0.0588235	0.140625	0.078125
0.0352941	0.0235294	0.115942	0.130435
0.056338	0.0422535	0.12	0.0933333
0.046875	0.015625	0.0909091	0.0681818
0.0526316	0.0394737	0.132353	0.132353
0.028169	0.0140845	0.101449	0.130435
0.05	0	0.075	0.125
