# Supplementary material for: NPAS4 recruits CCK basket cell synapses and enhances cannabinoid-sensitive inhibition in the mouse hippocampus
Source: eLife. 2018 Jul 27;7:e35927. doi: 10.7554/eLife.35927 (PMC6105310; doi:10.7554/eLife.35927)
Supplement: Figure 1—source data 1. [file elife-35927-fig1-data1.xlsx]

## Sheet: Fig 1
Fig 1C: Npas4 + neurons (%)
SE	EE
0.0700637	0.122302
0.00735294	0.114094
0.025	0.102941
0.0318471	0.136
0.0534351	0.0952381
0.0296296	0.0853658
0.0457516	0.125874
0.0208333	0.125
0.024	0.105263
Fig 1F: VGAT+Gephyrin IHF (A.U.)
SE		EE
WT	KO	WT	KO
240.648	204.411	335.194	163.913
184.293	212.662	251.678	226.463
207.476	212.68	256.856	204.385
207.222	220.384	300.619	229.648
214.909	203.532	184.088	208.163
192.355	207.472	298.804	212.617
209.223	163.459	305.162	223.446
212.895	236.549	273.752	226.655
234.585	206.381	280.615	189.09
206.207	179.578	289.024
	194.599	234.897
Fig 1G: VGAT+Gephyrin IHF (A.U.)
Superficial CA1				Deep CA1
SE		EE		SE		EE
WT	KO	WT	KO	WT	KO	WT	KO
62.3106	54.0818	134.793	28.5283	178.337	150.329	178.337	135.385
58.4227	63.4325	94.8793	56.3372	125.87	149.23	125.87	170.126
61.0536	79.6996	96.9784	49.1838	146.422	132.981	146.422	155.201
79.5547	84.4982	135.488	78.6281	127.667	135.886	127.667	151.02
57.2968	64.4318	49.9018	51.411	157.612	139.1	157.612	156.752
41.8673	39.7633	134.823	44.9401	150.487	167.708	150.487	167.676
62.7722	33.9357	138.104	78.5465	146.451	129.523	146.451	144.9
66.5769	103.465	133.702	58.8991	146.318	133.085	146.318	167.756
60.1364	46.4245	119.418	40.1207	174.449	159.956	174.449	148.97
53.5412	49.3098	106.178		152.666	130.268	152.666
	32.039	77.4551			162.56
Fig 1H: SE superficial eIPSC (nA)
WT	KO
626.59	1353.68
1270.31	716.641
478.094	393.068
834.119	2315.4
963.134	1206.92
1427.96	1070.08
612.376	845.812
1091.92	796.322
471.301	508.562
304.34	390.144
2030.48	1508.57
548.433	1232.89
90.3566	143.802
Fig 1I: EE superficial eIPSC (nA)
WT	KO
186.89	663.378
552.212	150.803
1658.07	1448.58
208.107	360.11
1621.36	1200.43
310.85	181.046
1812.26	1450.21
993.938	505.71
1634.85	544.083
2271.54	1005.79
399.039	274.398
1762.72	733.256
889.159	910.442
192.544	585.348
Fig 1J: (WT-KO)/(WT+KO) superficial
SE	EE
-0.367167	-0.560397
0.278653	0.570982
0.0976007	0.0674328
-0.47032	-0.267509
-0.112341	0.149171
0.143264	0.263885
-0.160086	0.110974
0.156547	0.325562
-0.0380267	0.500597
-0.123551	0.386214
0.147472	0.185082
-0.384241	0.412449
-0.228244	-0.0118265
	-0.50496
Fig 1K: SE deep eIPSC (nA)
WT	KO
1319.35	772.069
947.653	935.587
986.797	458.119
2594.98	1307.57
382.345	689.265
464.808	509.641
705.708	768.785
575.552	1173.16
646.945	1694.27
319.729	1748.5
1533.39	496.789
Fig 1L: EE deep eIPSC (nA)
WT	KO
1315.63	1885.85
1139.2	1112.94
726.907	2257.53
1976.94	304.971
1749.1	1441.5
732.573	174.367
981.482	978.56
1667.43	827.096
614.366	982.948
458.454	438.612
1247.91	718.022
Fig 1M: (WT-KO)/(WT+KO) deep
SE	EE
0.261679	-0.178111
0.00640704	0.01166
0.365888	-0.512868
0.329889	0.732706
-0.28641	0.0964082
-0.0460086	0.615483
-0.0427788	0.00149078
-0.341742	0.336871
-0.447343	-0.230751
-0.690819	0.0221188
0.510596	0.269535
