# Supplementary material for: NPAS4 recruits CCK basket cell synapses and enhances cannabinoid-sensitive inhibition in the mouse hippocampus
Source: eLife. 2018 Jul 27;7:e35927. doi: 10.7554/eLife.35927 (PMC6105310; doi:10.7554/eLife.35927)
Supplement: Figure 2—figure supplement 1—source data 1. [file elife-35927-fig2-figsupp1-data1.xlsx]

## Sheet: Fig 2 Supp. 1
Fig 2 Supp. 1: EE deep eIPSC (nA) with w-Agtx-IVA
WT	KO
1855.99	1385.33
711.929	1159.13
709.134	488.782
1293.14	1153.33
667.927	918.8
2256.18	1945.02
1910.49	1708.97
961.329	404.215
775.849	157.196
73.3576	456.048
131.872	119.046
648.531	78.6371
2761.91	2713.2
4881.29	2448.21
