# Supplementary material for: NPAS4 recruits CCK basket cell synapses and enhances cannabinoid-sensitive inhibition in the mouse hippocampus
Source: eLife. 2018 Jul 27;7:e35927. doi: 10.7554/eLife.35927 (PMC6105310; doi:10.7554/eLife.35927)
Supplement: Figure 2—source data 1. [file elife-35927-fig2-data1.xlsx]

## Sheet: Fig 2
Fig 2C: VGAT+Gephyrin+CB1R IHF (A.U.)
Superficial CA1				Deep CA1
SE		EE		SE		EE
WT	KO	WT	KO	WT	KO	WT	KO
64.07	37.132	118.582	43.211	37.7408	30.757	43.86	28.428
65.398	72.215	124.433	70.441	23.4803	31.754	40.697	34.633
85.667	52.741	124.82	68.607	41.7423	39.946	47.94	39.667
67.476	81.882	279.524	89.232	34.4758	35.328	25.467	42.237
67.9115	91.817	102.57		42.3991	46.125	46.9573
67.9674	57.499	207.146		39.389	38.52	37.663
64.0482	74.6882			46.1467	32.859
Fig 2D: SE superficial eIPSC (nA) with w-Agtx-IVA
WT	KO
840.579	265.056
949.904	702.19
529.12	288.194
460.18	736.179
752.515	709.839
755.456	515.091
747.648	483.463
316.102	575.754
1376.07	143.098
615.303	1245.3
598.464	238.145
354.346	1360.26
167.283	223.989
Fig 2E: EE superficial eIPSC (nA) with w-Agtx-IVA
WT	KO
1360.03	923.081
712.607	166.569
66.149	21.6931
428.37	187.501
526.26	375.087
362.811	221.006
238.414	391.081
397.838	169.751
1638.87	1836.02
343.046	261.758
593.624	117.1
575.934	262.343
215.407	44.6181
749.61	1080.9
478.154	122.795
152.351	55.4635
Fig 2F: (WT-KO)/(WT+KO) superficial with w-Agtx-IVA
0.520536	0.191383
0.149939	0.621079
0.294778	0.506089
-0.230699	0.391103
0.0291831	0.167719
0.189182	0.242893
0.214591	-0.242523
-0.291137	0.401852
0.81161	-0.0567356
-0.338598	0.134404
0.43069	0.670477
-0.586674	0.37409
-0.144927	0.656817
	-0.180982
	0.59133
	0.466221
