# Supplementary material for: NPAS4 recruits CCK basket cell synapses and enhances cannabinoid-sensitive inhibition in the mouse hippocampus
Source: eLife. 2018 Jul 27;7:e35927. doi: 10.7554/eLife.35927 (PMC6105310; doi:10.7554/eLife.35927)
Supplement: Figure 3—figure supplement 1—source data 1. [file elife-35927-fig3-figsupp1-data1.xlsx]

## Sheet: Fig 3 Supp. 1
Fig 3 Supp. 1: EE deep eIPSC (nA) with w-Ctx-GVIA
WT	KO
1099.33	360.798
201.533	177.769
1860.3	588.688
280.731	470.645
100.016	991.431
250.204	1671.33
293.577	364.051
621.679	1359.98
845.613	171.578
108.19	306.05
275.63	510.128
