# Supplementary material for: NPAS4 recruits CCK basket cell synapses and enhances cannabinoid-sensitive inhibition in the mouse hippocampus
Source: eLife. 2018 Jul 27;7:e35927. doi: 10.7554/eLife.35927 (PMC6105310; doi:10.7554/eLife.35927)
Supplement: Figure 3—source data 1. [file elife-35927-fig3-data1.xlsx]

## Sheet: Fig 3
Fig 3C: VGAT+Gephyrin+PV IHF (A.U.)
Superficial CA1				Deep CA1
SE		EE		SE		EE
WT	KO	WT	KO	WT	KO	WT	KO
60.046	83.516	62.5313	53.264	115.459	115.259	124.961	128.73
44.0917	72.2581	70.224	48.028	100.385	134.99	136.73	84.2656
56.901	43.3622	58.6604	56.3736	132.605	107.405	155.476	154.772
	26.216	41.823	58.358		122.113	152.585	160.193
		45.575	58.277			111.825	111.711
Fig 3D: SE superficial eIPSC (nA) with w-Ctx-GVIA
WT	KO
481.197	1105.07
210.621	151.513
221.221	261.266
831.385	721.568
233.765	617.422
1209.04	558.827
655.608	988.597
248.722	398.652
898.181	1098.34
Fig 3E: EE superficial eIPSC (nA) with w-Ctx-GVIA
WT	KO
319.424	810.769
124.589	273.573
749.807	414.671
152.408	206.103
1126.88	514.428
817.361	1645.38
562.427	71.2727
461.014	398.929
618.415	319.714
2229.59	2146.95
754.685	1159.61
439.473	548.606
1144.95	1746.12
Fig 3F: (WT-KO)/(WT+KO) superficial with w-Ctx-GVIA
WT	KO
-0.393296	-0.434744
0.163221	-0.374179
-0.0829971	0.287799
0.070715	-0.149772
-0.450732	0.373149
0.367795	-0.336218
-0.202523	0.775058
-0.231597	0.0721966
-0.100254	0.318401
	0.0188825
	-0.211527
	-0.11045
	-0.20794
