# Supplementary material for: NPAS4 recruits CCK basket cell synapses and enhances cannabinoid-sensitive inhibition in the mouse hippocampus
Source: eLife. 2018 Jul 27;7:e35927. doi: 10.7554/eLife.35927 (PMC6105310; doi:10.7554/eLife.35927)
Supplement: Figure 4—source data 1. [file elife-35927-fig4-data1.xlsx]

## Sheet: Fig 4
Fig 4B: FWHM (ms)
CCK INs	PV INs
1.01508	0.513084
1.09885	0.903823
1.00939	0.777924
1.02437	0.573322
1.1217	0.836215
0.907745	0.737469
0.89065	0.760017
1.28292	0.507443
0.823788	0.497766
0.985	0.835301
0.738279	0.656707
0.820306	0.756327
0.87278
0.916778
0.657243
0.984535
Fig 4F: PV uIPSC amp. (nA)
SE	EE
103.445	436.053
13.324	111.456
162.707	48.6269
111.475	270.971
1940.73	594.074
141.504	40.43
201.446	687.86
136.526	100.19
109.575	37.2003
191.043	126.026
126.611
476.938
243.041
607.826
Fig 4I: PV uIPSC amp. (nA)
SE	EE
281.466	176.954
269.776	730.29
222.21	93.8385
35.656	1564.73
66.5935	291.672
141.103	415.619
179.657	52.7371
195.443	131.52
107.4	456.114
58.696	961.683
	291.061
	241.499
