# Supplementary material for: NPAS4 recruits CCK basket cell synapses and enhances cannabinoid-sensitive inhibition in the mouse hippocampus
Source: eLife. 2018 Jul 27;7:e35927. doi: 10.7554/eLife.35927 (PMC6105310; doi:10.7554/eLife.35927)
Supplement: Figure 5—figure supplement 1—source data 1. [file elife-35927-fig5-figsupp1-data1.xlsx]

## Sheet: Fig 5 Supp. 1
Fig 5 Supp. 1: Latency to uIPSC onset (ms)
WT	KO
1.8	1.6
1.9	2.6
1.1	1.3
1.6	1.5
1.2	1.8
1.7	2.6
1.4	1.1
2.2	1.4
1.1	1.5
2.2	1.2
1.9
