# Supplementary material for: NPAS4 recruits CCK basket cell synapses and enhances cannabinoid-sensitive inhibition in the mouse hippocampus
Source: eLife. 2018 Jul 27;7:e35927. doi: 10.7554/eLife.35927 (PMC6105310; doi:10.7554/eLife.35927)
Supplement: Figure 5—source data 1. [file elife-35927-fig5-data1.xlsx]

## Sheet: Fig 5
Fig 5C: uIPSC amplitude (nA)
WT	KO
176.954	721.684
730.29	180.264
93.8385	130.458
1564.73	141.978
291.672	23.7005
415.619	39.1532
52.7371	86.1376
131.52	216.855
456.114	135.152
961.683	164.359
291.061
241.499
Fig 5E: Rise time (ms)
WT	KO
1.61237	0.844261
1.55363	1.39927
1.48125	0.708145
1.22411	0.837692
0.664474	1.01666
0.966476	1.65437
1.14309	1.14549
1.56438	1.15147
0.915108	0.893776
0.681717	0.983833
0.885757
0.804298
Fig 5F: Decay t (ms)
WT	KO
21.639	11.7518
13.0176	17.4268
14.0047	10.2065
14.0703	16.1435
12.0966	10.6631
14.509	18.6403
11.6871	14.821
17.9935	12.5923
14.7842	9.25677
13.0171	12.9894
11.7449
13.6245
Fig 5G: Success Rate
WT	KO
1	0.982759
1	0.882979
0.781818	0.905405
1	0.904255
0.936842	0.681564
1	0.623762
0.8	0.608108
1	0.877358
0.902913	0.932432
1	0.826087
0.911765
0.967742
Fig 5H: PPRs
20 ms ISI			50 ms ISI			200 ms ISI			1000 ms ISI
WT	KO		WT	KO		WT	KO		WT	KO
0.626706	0.488664		0.511205	0.902854		0.861053	1.15162		1.06396	0.655204
0.319942	0.784004		0.521111	1.3248		0.844472	0.62031		1.14225	1.24082
0.610508	0.640401		0.725341	0.627806		0.927012	0.632029		1.22776	0.909903
0.103633	0.983774		0.106662	0.907786		0.612976	0.548983		0.893721	0.404501
0.827667	1.09543		0.964891	1.21594		0.80874	1.33729		0.820225	0.236677
1.27007	0.65304		1.00047	0.612126		0.921529	0.399384		0.685672	0.585575
1.02223	0.840615		0.837555	1.42123		0.588976	1.42123		0.88686	1.94794
0.985708	0.983928		0.793296	1.57612		0.919122	1.57612		1.02626	0.889947
1.09536	1.4295		1.38613	0.608824		0.950136	0.608824		1.1558	1.26636
0.850837	2.47155		0.85236	0.680492		0.881727	0.680492		0.972314	0.320852
1.23875			1.63989			0.763182			0.434629
Fig 5I: CV vs uIPSC amp. (pA)
WT		KO
CV	uIPSC amp.	CV	uIPSC amp.
30.2166	176.954	31.3119	721.684
30.7231	730.29	52.2319	180.264
79.2687	93.8385	56.1932	130.458
21.0496	1564.73	85.5014	141.978
46.9657	291.672	118.949	23.7005
36.7757	415.619	119.777	39.1532
65.8082	52.7371	113.972	86.1376
75.6862	131.52	84.2168	216.855
34.5549	456.114	54.9299	135.152
17.8656	961.683	76.9594	164.359
37.112	291.061
53.9702	241.499
Fig 5J: CV
WT	KO
30.2166	31.3119
30.7231	52.2319
79.2687	56.1932
21.0496	85.5014
46.9657	118.949
36.7757	119.777
65.8082	113.972
75.6862	84.2168
34.5549	54.9299
17.8656	76.9594
37.112
53.9702
Fig 5K: Variance vs. uIPSC amp. (nA)
WT		KO
Variance	uIPSC amp.	Variance	uIPSC amp.
2066.14	176.954	36843.2	721.684
38069	730.29	7135.41	180.264
2553.75	93.8385	5117.1	130.458
105981	1564.73	20083.8	141.978
18794.3	291.672	700.619	23.7005
24276.7	415.619	2021.82	39.1532
1145.61	52.7371	4159.06	86.1376
6990.23	131.52	9926	216.855
18909.7	456.114	13245.4	135.152
28792.5	961.683	11347	164.359
11099.1	291.061
15960.4	241.499
Fig 5M: Asynch. Event amp. (pA)
WT	KO
54.4221	64.7177
40.6667	27.057
56.4433	57.9421
65.5097	83.9288
68.1137	47.1828
59.0834	74.7802
	77.8318
	59.8824
