# Supplementary material for: NPAS4 recruits CCK basket cell synapses and enhances cannabinoid-sensitive inhibition in the mouse hippocampus
Source: eLife. 2018 Jul 27;7:e35927. doi: 10.7554/eLife.35927 (PMC6105310; doi:10.7554/eLife.35927)
Supplement: Figure 6—source data 1. [file elife-35927-fig6-data1.xlsx]

## Sheet: Fig 6
Fig 6C: DSI magnitude (%)
WT		KO
SE	EE	SE	EE
-0.0646432	0.463289	0.196269	0.188
0.581866	0.457874	0.334105	0.384944
-0.00125671	0.652338	0.313368	0.482032
-0.0835654	0.148108	0.230271	0.322311
0.348626	0.305302	0.50917	0.108876
0.507285	0.518485	0.0596938	0.000549885
-0.0169079	0.714652	0.641953	0.446264
0.12674	0.616599	0.221394	0.33521
0.333599	0.638082	0.486373	0.261996
0.545955	0.196509	0.568884	0.296799
0.654787	0.582349	0.498067	0.061494
0.223515	0.42063	0.0733627	0.669815
0.590055	0.425014	-0.0541611	0.230306
0.266686	0.54866	0.291472
-0.0650634
