# Supplementary material for: NPAS4 recruits CCK basket cell synapses and enhances cannabinoid-sensitive inhibition in the mouse hippocampus
Source: eLife journal article supplement (doi:10.7554/elife.35927), 2018-07-27

Figure 1- Supplement 1. Superficial and deep CA1 PN express NPAS4 equivalently after exploration of an EE

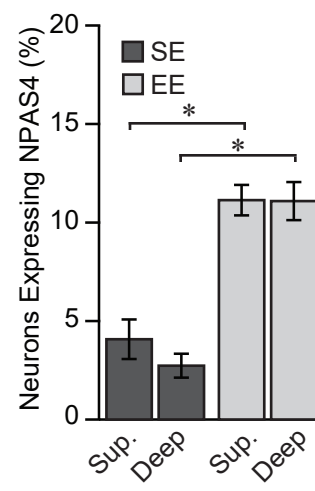

Supplement: supp [file elife-35927-supp-v1.zip]
