# Supplementary material for: NPAS4 recruits CCK basket cell synapses and enhances cannabinoid-sensitive inhibition in the mouse hippocampus
Source: eLife journal article supplement (doi:10.7554/elife.35927), 2018-07-27

Figure 4- Supplement 1. CCKBCs can be differentiated from dendritic SCA interneurons by synaptic properties and morphology

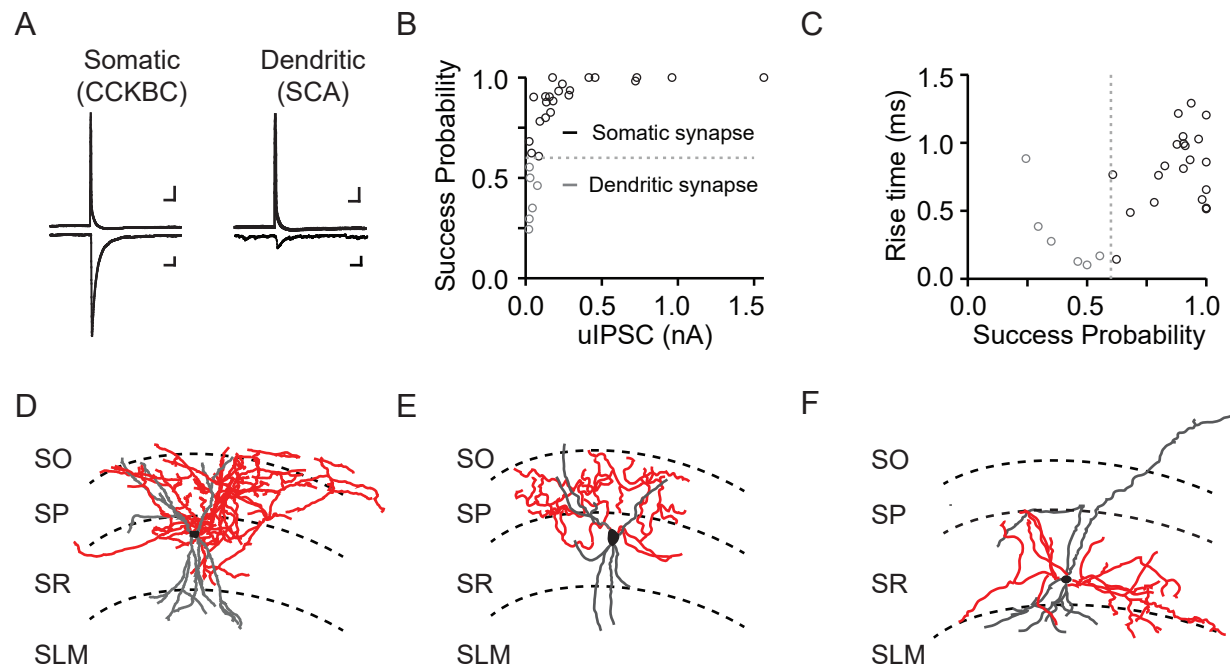

Supplement: supp [file elife-35927-supp-v1.zip]
