# Supplementary figures and images for: NPAS4 recruits CCK basket cell synapses and enhances cannabinoid-sensitive inhibition in the mouse hippocampus
Source: eLife journal article supplement (doi:10.7554/elife.35927), 2018-07-27

Figure 2 Supplement 1: Experience-induced Npas4 does not affect CCKBC inputs onto deep CA1 PN

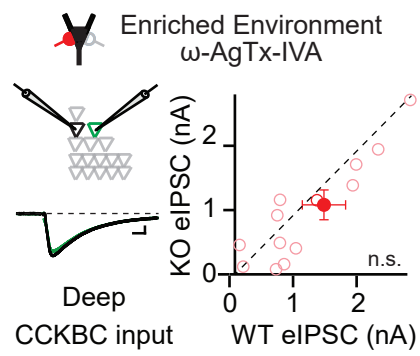

Supplement: supp [file elife-35927-supp-v1.zip]

Figure 5- Supplement 1. CCKBC-PN pairs with WT and KO PNs have similar latencies to uIPSC onset

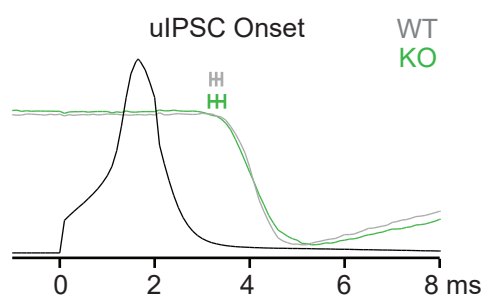

Supplement: supp [file elife-35927-supp-v1.zip]

Figure 3 Supplement 1: Experience-induced Npas4 does not affect PVBC inputs onto deep CA1 PNs

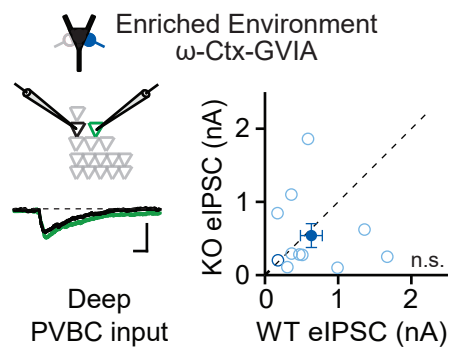

Supplement: supp [file elife-35927-supp-v1.zip]
